# Supplementary material for: Novel Approaches for the Treatment of Alzheimer’s and Parkinson’s Disease
Source: MDPI journal article supplement (doi:10.3390/ijms20030719), 2019-02-08
Supplement: s1 [file s1]

**Table S1. Influence of novel drugs targets for treatment of Alzheimer disease.**

| Targets                                   | Class Type                                                       | Compounds                            | Direct and indirect effects                                                                                                                                                 | Publications/Clinical Trials                                                  |
|-------------------------------------------|------------------------------------------------------------------|--------------------------------------|-----------------------------------------------------------------------------------------------------------------------------------------------------------------------------|-------------------------------------------------------------------------------|
| <b>Amyloid-Beta and excitotoxicity</b>    | AChE inhibitors                                                  | Donepezil, Galantamine, Rivastigmine | Improvement in memory and cognitive and impairment as well as behaviour impairment                                                                                          | 68                                                                            |
|                                           |                                                                  | Tacrine derivatives (KT2D)           | Neuroprotection against A $\beta$                                                                                                                                           | 70, 75                                                                        |
|                                           | NMDAR antagonist                                                 | Memantine                            | ↓ Excitotoxicity, improvement in memory and cognitive impairment                                                                                                            | 68                                                                            |
|                                           |                                                                  | Sirt1 enhancer (A03)                 | ↑ Sirt1 expression and memory improvement                                                                                                                                   | 78, 79, 80, 81, 82, 83, 84                                                    |
|                                           | Immunotherapy (IMT)                                              | Gantenerumab                         | Passive Immunization by ↓ A $\beta$ spreading and aggregation, ↑ microglial activation and ↑ phagocytosis                                                                   | 71, 72 NCT03443973, NCT03444870, NCT02051608, NCT01224106, NCT01760005        |
|                                           |                                                                  | Crenezumab                           | Passive Immunization by ↓ A $\beta$ spreading and aggregation, ↑ microglial activation and ↑ phagocytosis                                                                   | 71, 72, 73, NCT02353598, NCT01998841, NCT02670083, NCT03443973, NCT03491150), |
|                                           |                                                                  | Aducanumab                           | Passive Immunization by ↓ A $\beta$ spreading and aggregation, ↑ microglial activation and ↑ phagocytosis                                                                   | 71,72, NCT01677572, NCT02484547, NCT02477800, NCT03639987                     |
|                                           | ETB receptor agonist                                             | IRL-1620                             | ↑ Clearance of ET-1 and A $\beta$ , ↓ oxidative stress, ↑ neurogenesis and synaptogenesis improve memory deficiency                                                         | 69, 91, 92, 93, 94                                                            |
| <b>Mitochondria</b>                       | Dopamine derived structure                                       | DDQ                                  | ↑ Mitochondrial biogenesis, ↑ Mitochondrial fusion activity, ↓ mitochondrial fission activity, ↓ A $\beta$ toxicity                                                         | 95                                                                            |
| <b>Autophagy</b>                          | CRMP2 modulator                                                  | LKE                                  | Normalization of CRMP2 phosphorylation, ↓ A $\beta$ -plaques load, ↓ phosphorylated tau, ↑ growth factor-dependent neurite outgrowth as well as autophagy related processes | 99, 100                                                                       |
|                                           | Cyclin-dependent kinase modulator                                | Cdk5 inhibitors                      | ↑ Autophagy by ↓ CRMP2 hyper-phosphorylation                                                                                                                                | 103, 104                                                                      |
| <b>Neuroinflammation</b>                  | Tetracycline antibiotic                                          | Minocycline                          | ↓ Proinflammatory (TNF- $\alpha$ and IL-1 $\beta$ ) and ↑ anti-inflammatory cytokines (IL-10)                                                                               | 109                                                                           |
| <b>Neurogenesis and neuronal survival</b> | Ciliary Neurotrophic factor                                      | P021                                 | Inhibition of LIF signalling and ↑ the BDNF expression; ↑ neurogenesis by rescuing dendritic, synaptic and cognitive impairment; ↓ A $\beta$ and tau mediated aggregation   | 110                                                                           |
|                                           | Natural disaccharide                                             | Trehalose                            | ↓ A $\beta$ aggregation, ↑ hippocampal neurogenesis and synaptic plasticity, ↑ neuronal growth and survival                                                                 | 75, 111, 112, 113, 114                                                        |
|                                           | Type II anti-diabetic                                            | Metformin                            | ↑ neurogenesis, ↓ oxidative stress, ↓ cognitive impairment                                                                                                                  | 68, 116                                                                       |
|                                           | Allopregnanolones                                                | BR297                                | ↑ steroidogenesis, improving mitochondrial bioenergetics by ↑ cellular ATP production and ↓ oxidative stress, Preventing neuronal cell death                                | 120, 121, 122                                                                 |
|                                           | Nurr1 activators                                                 | amodiaquine                          | ↑ Dopaminergic neurogenesis, ↑ hippocampal neurogenesis<br>↓ A $\beta$ plaques deposition, ↓ neuronal loss & microglia activation                                           | 207, 219                                                                      |
| <b>Metal ions homeostasis</b>             | Cu <sup>2+</sup> , Zn <sup>2+</sup> , Fe <sup>3+</sup> chelators | PBT1 and PBT2                        | ↓ A $\beta$ -plaques load and ↓ cognitive impairment                                                                                                                        | 65, 66, 117                                                                   |
|                                           | AChE inhibitor                                                   | BPT derivatives                      | Inhibition of Cu <sup>2+</sup> - and Fe <sup>3+</sup> -mediated A $\beta$ aggregation                                                                                       | 74, 75                                                                        |
|                                           | Fe2+ chelators                                                   | DFO                                  | ↓ $\alpha$ -Syn- and A $\beta$ -mediated-iron load, ↓ cognitive impairment                                                                                                  | 117                                                                           |

Arrows indicates; (↑), increase and (↓), decrease. All abbreviation are explained in text.

**Table S2. Influence of novel drugs targets for treatment of Parkinson's disease.**

| Targets                                   | Compounds                  | Direct and indirect effects                                                                                                | Publications/Clinical Trials |
|-------------------------------------------|----------------------------|----------------------------------------------------------------------------------------------------------------------------|------------------------------|
| <b>α-Syn and LRRK2</b>                    | Antisense oligonucleotides | ↓ α-Syn synthesis and ↓ LRRK2 synthesis                                                                                    | 129, 213                     |
|                                           | DLN201                     | Inhibition of LRRK2 kinase activity                                                                                        | NCT03710707                  |
|                                           | GZ/SAR40261                | GCS inhibitor, ↑ α-Syn degradation and ↑ lysosomal activity                                                                | 130, NCT02906020             |
|                                           | Ambroxol                   | GBA activator, ↑ α-Syn degradation, ↑ lysosomal activity                                                                   | NCT02941822                  |
|                                           | Caspase-1 inhibitor        | ↓ C-terminal truncation and ↓ α-Syn cleavage and toxicity                                                                  | 132, 133                     |
|                                           | Anle138 and SynuClean-D    | Stabilization of α-Syn structure and prevention oligomerization by ↓ α-Syn misfolding and aggregation                      | 134                          |
|                                           | NTP200-11                  |                                                                                                                            | NCT02906020                  |
|                                           | Nilotinib                  | Inhibition of c-Abl kinase activity, ↓ α-Syn aggregation                                                                   | 136, NCT03205488             |
|                                           | PRX002 and BIIB054         | Passive Immunization by ↓ α-Syn spreading                                                                                  | NCT02157714, NCT03318523     |
| <b>Mitochondria</b>                       | PD01A and PD03A            | Active Immunization by ↓ α-Syn spreading                                                                                   | NCT02216188, NCT02267434     |
|                                           | STI-571                    | ↑ Parkin-mediated mitophagy                                                                                                | 144                          |
|                                           | NIX                        | Mitochondrial autophagy receptor Nip3-like protein X restores mitophagy                                                    | 140                          |
|                                           | USP30 inhibitors           | ↑ Parkin-mediated mitophagy                                                                                                | 147                          |
|                                           | BG12                       | ↑ Mitochondrial biogenesis by activation of Nrf2                                                                           | 148                          |
| <b>Autophagy</b>                          | Quercetin                  | ↑ Mitochondrial biogenesis by activation of PGC1α                                                                          | 150, 151                     |
|                                           | TFEB                       | ↑ Autophagy                                                                                                                | 160, 162, 163                |
|                                           | KYP-2047                   | ↑ Beclin-1 mediated autophagy by inhibition of PREP                                                                        | 168                          |
|                                           | PLGA-aNPs                  | ↑ Autophagy by ↑ lysosomal activity                                                                                        | 169                          |
|                                           | NCGC607                    | ↑ Autophagy by ↑ chaperone-GCase mediated lysosomal activity                                                               | 165, 170, 171                |
| <b>Ca<sup>2+</sup> homeostasis</b>        | Isradipine                 | Inhibition of Ca <sup>2+</sup> channels, ↓ mitochondrial oxidative stress                                                  | 173, 175, NCT02168842        |
| <b>Neuroinflammation</b>                  | Maxadilan                  | ↑ PACAP activity by cAMP, ↓ microglial pro-inflammatory cytokines                                                          | 180, 181, 182                |
|                                           | S14                        | PDE7 inhibition, ↑ adult neurogenesis and ↑ anti-inflammatory responses                                                    | 185, 186, 187, 209           |
|                                           | Glitazones derivatives     | ↑ PPARγ activation, ↑ neuroprotection, ↓ microglial pro-inflammatory cytokines                                             | 189, 190, 191, 192, 193      |
| <b>Neurogenesis and neuronal survival</b> | CDNF and MANF              | Protection and repair of dopaminergic neurons                                                                              | 202, NCT03775538             |
|                                           | PDGF-BB                    | ↑ Dopaminergic neurogenesis in the subventricular zone                                                                     | 205, 206                     |
|                                           | Nurr1 activators           | ↑ Dopaminergic neurogenesis, ↑ hippocampal neurogenesis<br>↓ Aβ plaques deposition, ↓ neuronal loss & microglia activation | 207, 219                     |
|                                           | CREB activator (Rolipram)  | ↑ Dopamine neurogenesis by ↑ of dendritic outgrowth                                                                        | 208                          |
|                                           | Tideglusib                 | ↑ Neurogenesis in the dentate gyrus of the hippocampus by inhibition of GSK-3                                              | 210                          |
|                                           | IPS cells transplantation  | ↑ Dopaminergic cells                                                                                                       | 211                          |
| <b>Metal ions homeostasis</b>             | PBT1 and PBT2              | Cu <sup>2+</sup> , Zn <sup>2+</sup> , Fe <sup>3+</sup> chelators; ↓ Aβ-plaques load and ↓ cognitive impairment             | 65, 66, 117                  |
|                                           | DFO and DFP                | Fe <sup>2+</sup> chelators, ↓ α-Syn- and Aβ-mediated-iron load, ↓ motor & cognitive impairment                             | 117                          |

Arrows indicates; (↑), increase and (↓), decrease. All abbreviations are explained in text.
